# Supplementary material
Source: PubMed Central journal article supplement (PMC2835026)

# Suppl Fig 1

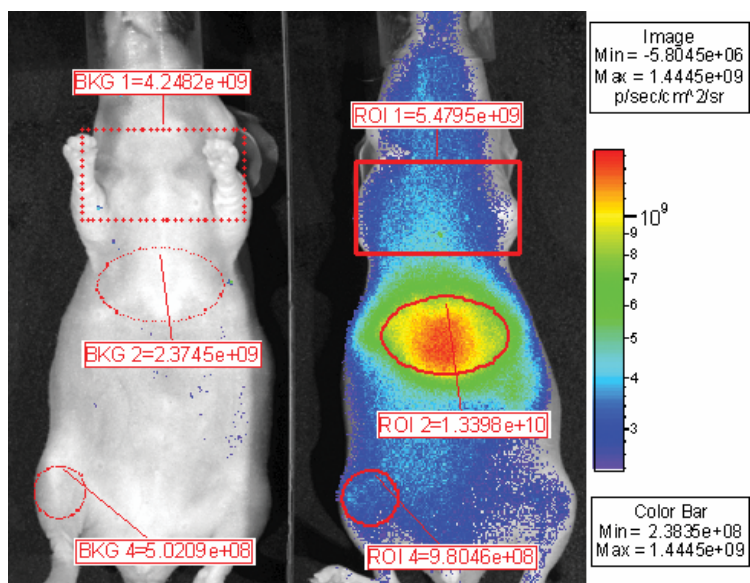

Supplement: mt2009201x1.pdf [file mt2009201x1.pdf]
